# Supplementary material
Source: publisher site journal article supplement (https://kjim.org/upload/media/kjim-2024-439-Supplementary-Fig-3.pdf)
Supplement: Supplementary file 1 [file kjim-2024-439-Supplementary-Fig-3.pdf]

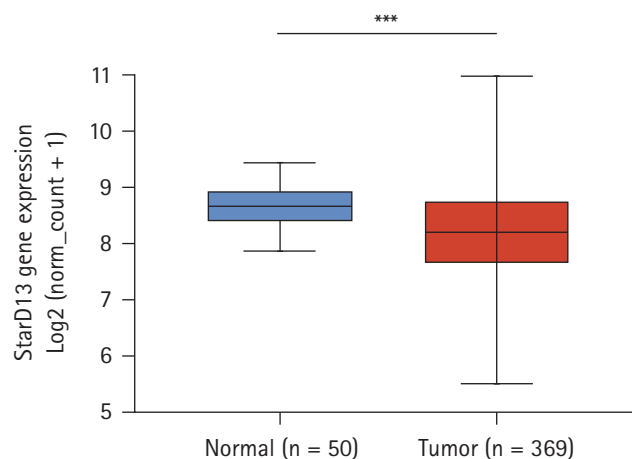

**Supplementary Figure 3.** StarD13 gene expression in HCC tissues was compared with that in normal tissues using the TCGA database. HCC tissues have significantly lower expression of StarD13 than normal tissues (n = 50 for normal and n = 369 for tumors). HCC, hepatocellular carcinoma. \*\*\* $p < 0.001$ .
